# Supplementary material for: The application of omics techniques to evaluate the effects of Tanshinone IIA on dextran sodium sulfate induced ulcerative colitis
Source: Royal Society of Chemistry journal article supplement (doi:10.1039/d2mo00074a), 2022-05-25
Supplement: d2mo00074a2.xlsx [file d2mo00074a2.xlsx]

## Sheet: Sheet1
Zhu et al. The application of omics techniques to evaluate the effects of Tanshinone IIA on dextran sodium sulfate induced ulcerative colitis
Supplementary Table S1. Peak area ratios of Tanshinone IIA on dextran sodium sulfate induced ulcerative colitis.
Metabolites	m/z	tR	Control1	Control2	Control3	Control4	Control5	Control6	Model1	Model2	Model3	Model4	Model5	Model6	Tan IIA-20-1	Tan IIA-20-2	Tan IIA-20-3	Tan IIA-20-4	Tan IIA-20-5	Tan IIA-20-6	Tan IIA-40-1	Tan IIA-40-2	Tan IIA-40-3	Tan IIA-40-4	Tan IIA-40-5	Tan IIA-40-6	Tan IIA-60-1	Tan IIA-60-2	Tan IIA-60-3	Tan IIA-60-4	Tan IIA-60-5	Tan IIA-60-6
LysoPC(16:0)	496.339	4.45	0.41827	-0.14533	0.24008	-0.25658	-0.1671	-0.23321	3.53668	3.44363	3.69214	3.40813	3.67566	3.47094	1.74012	1.88302	1.46804	1.45953	1.43602	1.25121	1.77408	1.82056	1.39535	1.78802	1.54176	1.57567	0.28521	1.37868	1.00252	0.89296	0.5757	1.16323
LysoPC(18:1)	506.361	3.74	0.28229	0.18029	-0.20013	-0.02001	-0.10223	-0.21345	2.33009	2.07407	2.27983	2.15957	1.97109	2.28333	0.45261	0.61477	0.56296	0.23551	0.25649	0.32786	0.475	0.43398	-0.12405	-0.32678	0.23258	0.28125	-0.03689	0.12463	0.22744	-0.01688	0.10424	0.1569
LysoPC(20:4)	544.34	3.84	-0.04134	-0.16792	0.14229	0.21235	0.02448	-0.21964	3.35434	3.15894	3.60797	3.20946	3.30233	3.3382	2.05205	1.9794	1.58422	1.94482	1.83397	1.57935	1.31383	1.12167	1.58436	1.87801	1.01691	1.02073	1.02468	0.98113	0.98002	1.17783	1.67483	1.09554
LysoPC(22:6)	568.34	3.81	-0.11676	-0.1273	0.17111	0.27732	-0.01875	-0.25627	3.38976	3.07069	3.42584	3.30712	3.19735	2.97853	0.34057	0.46052	0.46069	0.73501	0.39859	0.16094	0.85537	1.01625	0.62843	1.28065	0.84238	1.2374	0.49671	0.05758	0.42902	-0.22653	0.00792	-0.09283
L-Glutamine	147.077	6.7	0.02468	-0.28371	0.03303	-0.21351	0.24255	-0.09574	-2.50708	-1.61827	-1.77819	-2.65294	-2.41393	-2.03196	-1.0196	-1.04402	-0.9776	-1.33998	-1.14421	-1.12306	0.23168	-0.5481	-0.37517	-0.58688	-0.39821	-0.31458	-0.25602	-0.15379	-0.59563	-0.29287	-0.01929	-0.493
N-Acetylleucine	174.112	0.87	0.43501	-0.03504	-0.51612	-0.43941	0.13799	0.18272	5.64747	5.76037	5.67389	5.76204	6.16209	5.88456	4.33153	4.20772	4.30093	5.04119	4.50296	4.55886	5.3849	5.83668	5.52586	5.19075	5.25442	5.76156	1.92376	1.84092	2.06514	2.78899	2.74929	2.60037
11-Dehydro-thromboxane B2	369.224	8.16	-0.34277	0.38459	0.02337	-0.11449	0.26414	-0.38649	-1.88954	-3.66725	-3.23652	-2.02342	-2.76087	-2.55118	-2.03589	-2.33557	-2.47344	-2.48432	-2.49592	-2.30799	-1.70067	-1.23711	-1.38584	-1.40001	-1.09586	-1.68695	-0.66564	-0.78548	-0.98961	-0.7447	-0.78904	-0.91954
Phosphocreatine	212.043	7.63	0.167758	-0.06927	-0.1965	-0.21586	0.149344	0.112113	6.8695	5.78024	6.6705	5.35975	4.68254	4.50975	5.63765	8.63102	6.46136	8.30477	8.16614	8.42146	5.25318	4.45585	6.43152	4.4175	4.37859	4.66894	0.64453	0.513114	0.336476	0.451496	0.636901	0.504357
LysoPE(16:0)	187.072	5.51	-0.04505	-0.06702	0.074411	-0.00125	0.083646	-0.07308	1.21191	1.21032	1.20524	1.19911	1.30125	1.23987	1.05644	0.961311	0.888688	0.910025	1.37038	0.968957	1.03486	1.03863	1.05102	1.03463	1.05072	1.02875	0.084468	0.163043	-0.16447	0.007176	0.161148	-0.14508
LysoPE(18:1)	275.089	7.79	0.16457	-0.25811	0.320768	-0.23577	0.301172	-0.48881	3.21764	3.21032	3.10815	3.10729	3.16947	3.04326	2.36988	2.166	2.65212	2.36076	2.42137	2.94075	-0.01539	0.645805	0.253017	0.359418	0.574889	0.044648	0.084468	0.163043	-0.16447	0.007176	0.161148	-0.14508
8-HETE	153.019	0.86	0.104756	0.18491	-0.46418	0.117925	0.005634	-0.03804	1.08309	1.28503	1.17305	1.06761	1.16072	1.17332	0.207736	0.413983	0.500291	0.244802	0.157139	0.407005	-0.25388	0.110085	0.151854	0.356907	0.399009	0.025684	0.012325	-0.04523	0.244481	0.30235	-0.40303	-0.60427
LysoPE(20:4)	278.139	3.21	-0.07479	-0.00084	-0.00508	0.26242	-0.09148	-0.12569	8.47051	9.88726	6.91743	7.65745	9.91876	8.59947	7.65916	6.44954	8.3842	6.57193	5.78598	5.47976	5.93357	4.05275	5.89669	6.95625	7.0363	6.04339	4.56749	2.34543	4.03195	3.62421	4.1057	5.31071
Hydroxypyruvic acid	312.13	3.7	-0.02023	-0.35456	0.006047	0.374132	0.126929	-0.25224	1.95712	1.53817	1.70995	2.00664	1.99153	1.84387	1.01022	0.68216	1.16805	0.775792	0.954414	0.859414	1.06398	1.29052	1.41859	1.59842	1.33115	1.62219	0.58571	0.86009	0.345206	0.824428	0.646042	0.718527
N-Acetylhistidine	116.071	3.87	-0.33893	-0.5119	-0.02726	0.377244	0.323383	-0.03318	5.72218	4.40236	6.66605	7.67183	6.69638	5.50223	5.40115	3.41817	5.20587	4.50033	5.28719	4.97414	5.60144	2.1885	5.38905	4.36127	5.32409	3.35107	3.91075	2.19407	2.54905	5.05277	1.99426	4.84154
15-Deoxy-d-12,14-PGJ2	103.003	6.63	-0.11698	0.224119	-0.22159	-0.12474	-0.2696	0.384582	-9.28621	-7.31912	-6.88238	-7.30251	-9.50063	-9.4385	-5.93991	-4.68015	-3.67111	-3.18433	-3.61526	-4.27318	-3.83159	-2.27328	-1.31069	-2.22422	-3.57825	-4.09049	-0.46496	-0.61359	-0.09297	-0.19305	-0.37104	-0.49624
Betaine	196.072	5.59	0.315324	-0.52967	0.29894	0.280276	-0.27542	-0.33621	2.13308	1.95243	3.15225	5.35259	1.67045	1.19825	2.13257	1.90263	1.92274	1.59968	1.53449	2.23356	2.00564	1.71219	1.95302	2.10308	1.66057	2.1422	2.09228	1.80214	1.74048	2.02173	2.36671	2.40034
Taurine	315.196	1.93	-0.08064	-0.16718	0.022703	0.23921	-0.04196	-0.00543	1.91139	4.84198	1.68623	3.80644	1.85081	3.80121	0.134139	0.517722	0.718455	0.477834	0.613128	0.726136	0.838743	0.763935	0.771593	0.825606	0.412861	0.570338	-0.25728	-0.05362	-0.10889	-0.06881	0.219563	-0.16522
1,7-Dimethylguanosine	124.007	5.37	0.196147	-0.06476	0.239366	0.087427	-0.02326	-0.57496	2.99564	2.47591	2.50341	3.12679	3.19426	3.35565	0.832727	0.946799	1.24843	1.57987	1.56242	1.94121	2.36033	2.59092	1.85578	1.85845	1.78409	1.98954	-0.5643	-0.81282	0.497021	3.02795	-0.25904	-0.00133
Hippuric acid	178.05	3.56	-0.43453	0.195938	-0.04991	0.339744	0.181174	-0.41647	-2.54845	-2.32756	-1.90924	-2.63205	-2.22697	-1.97244	-1.44319	-0.87225	-1.52307	-1.42506	-1.73736	-1.68494	-1.94574	-2.15241	-1.82693	-2.24702	-2.7008	-2.66839	-0.70108	-0.73129	-0.7699	-0.65942	-0.38745	-0.40267
Leukotriene B5	333.207	1.91	-0.06129	0.183067	0.01812	-0.13734	0.241471	-0.31784	1.78889	1.92767	1.67819	1.75721	1.59221	1.83303	-0.15717	-0.01065	0.056618	-0.14723	-0.16085	0.415446	0.47807	0.36338	0.546198	0.634435	0.274185	0.285637	-0.07654	0.187334	0.017052	-0.34449	-0.05395	-0.10195
