# Supplementary figures and images for: The application of omics techniques to evaluate the effects of Tanshinone IIA on dextran sodium sulfate induced ulcerative colitis
Source: Royal Society of Chemistry journal article supplement (doi:10.1039/d2mo00074a), 2022-05-25

### *Supplementary Material*

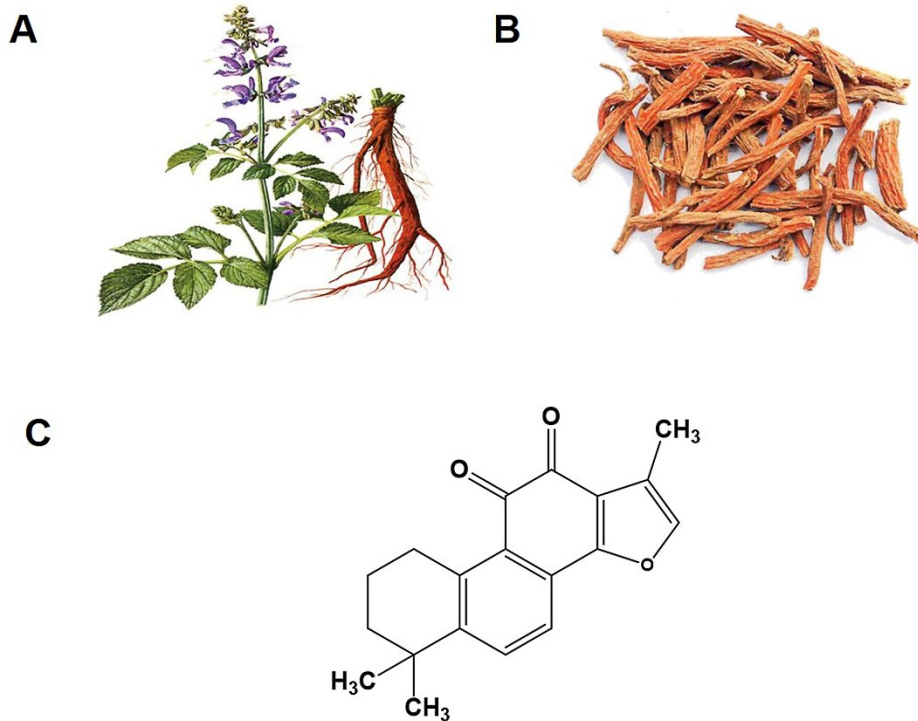

**Fig. S1.** The sources and Chemical structure of Tanshinone IIA.

Supplement: d2mo00074a1.pdf [file d2mo00074a1.pdf]
